# Supplementary material for: Lateral Orbitofrontal Cortex Involvement in Initial Negative Aesthetic Impression Formation
Source: PubMed Central journal article supplement (PMC3367021; doi:10.1371/journal.pone.0038152), 2012-06-04
Supplement: pone.0038152.s001.pdf [file pone.0038152.s001.pdf]

## Supplementary Results

### Not Beautiful 0-100 ms

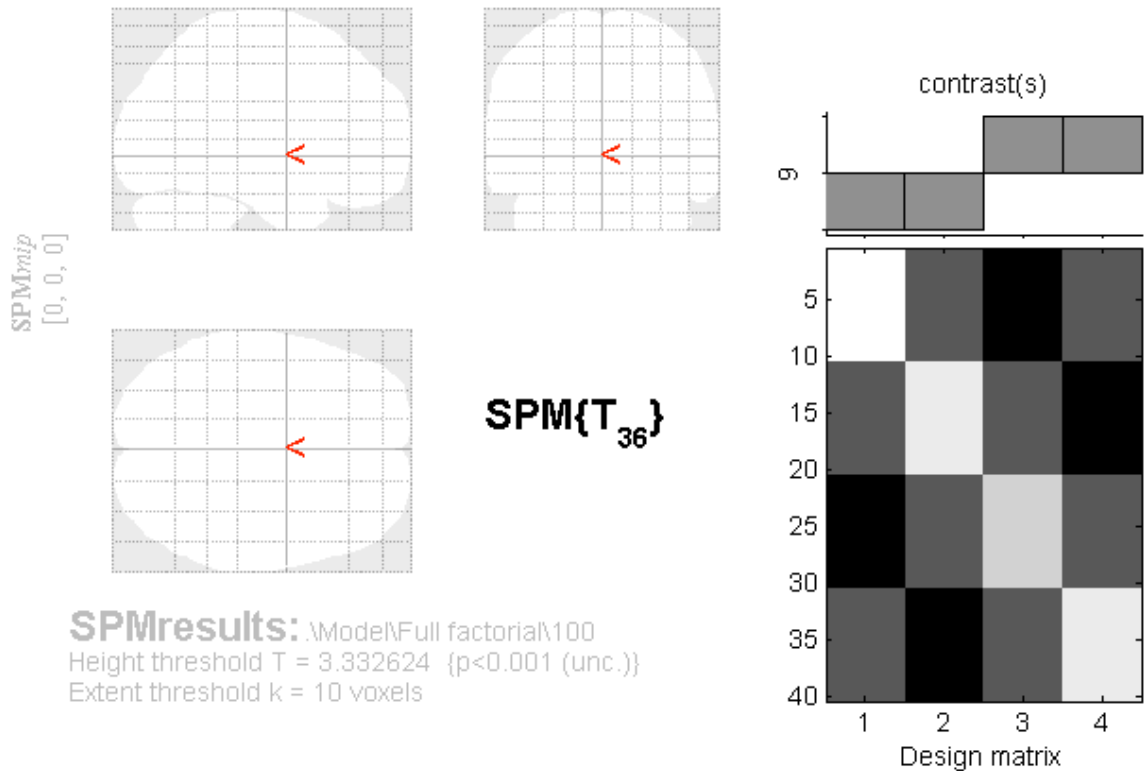

#### Statistics: *p-values adjusted for search volume*

| set-level |     | cluster-level         |                       |       |                     | peak-level            |                       |     |                    | mm mm mm            |  |  |  |
|-----------|-----|-----------------------|-----------------------|-------|---------------------|-----------------------|-----------------------|-----|--------------------|---------------------|--|--|--|
| $p$       | $c$ | $p_{\text{FWE-corr}}$ | $q_{\text{FDR-corr}}$ | $k_E$ | $p_{\text{uncorr}}$ | $p_{\text{FWE-corr}}$ | $q_{\text{FDR-corr}}$ | $T$ | $(Z_{\text{max}})$ | $p_{\text{uncorr}}$ |  |  |  |

*no suprathreshold clusters*

*table shows 3 local maxima more than 8.0mm apart*

|                                                           |                                                           |
|-----------------------------------------------------------|-----------------------------------------------------------|
| Height threshold: $T = 3.33$ , $p = 0.001$ (0.999)        | Degrees of freedom = [1.0, 36.0]                          |
| Extent threshold: $k = 10$ voxels, $p = 0.641$ (0.988)    | FWHM = 15.2 15.9 15.3 mm mm mm; 7.6 7.9 7.7 (voxels)      |
| Expected voxels per cluster, $\langle k \rangle = 44.712$ | Volume: 2093352 = 261669 voxels = 529.8 resels            |
| Expected number of clusters, $\langle c \rangle = 4.46$   | Voxel size: 2.0 2.0 2.0 mm mm mm; (resel = 463.36 voxels) |
| FWEp: 5.464, FDRp: Inf, FWEc: Inf, FDRc: Inf              |                                                           |

## Not Beautiful 100-200 ms

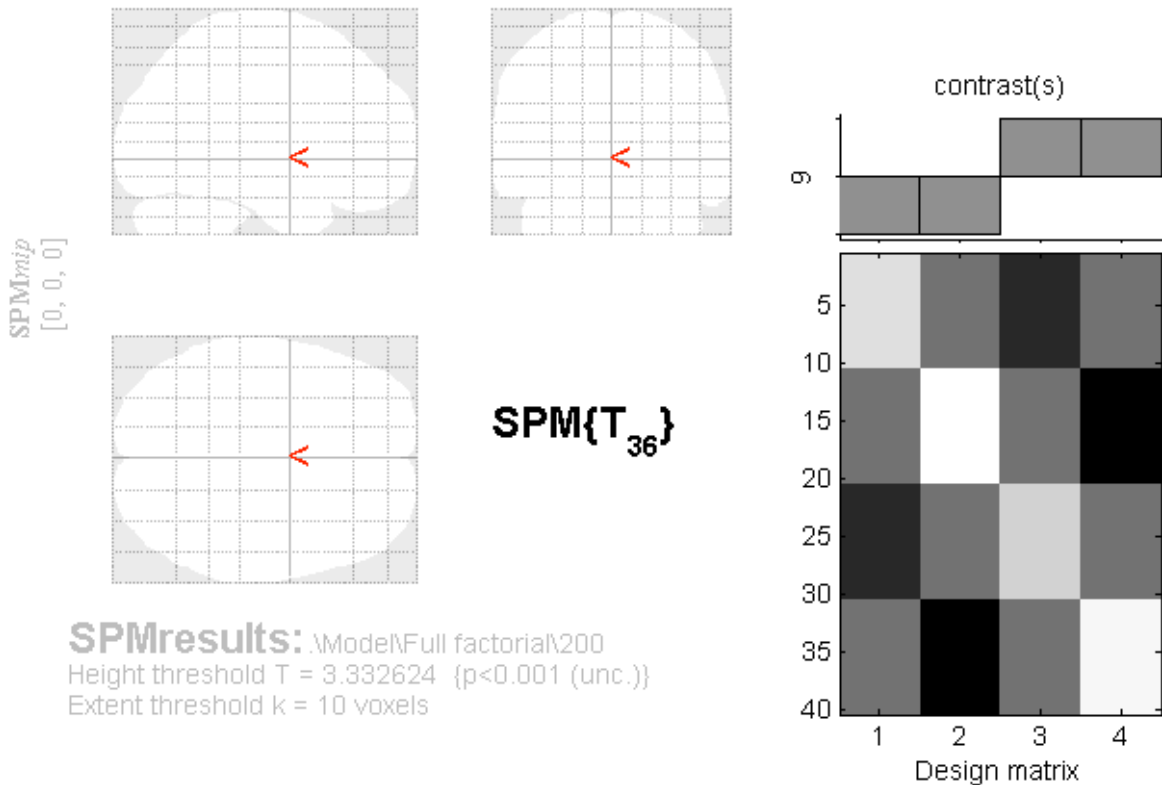

### Statistics: *p-values adjusted for search volume*

| set-level |     | cluster-level         |                       |       |                     | peak-level            |                       |     |                | mm mm mm            |  |  |  |
|-----------|-----|-----------------------|-----------------------|-------|---------------------|-----------------------|-----------------------|-----|----------------|---------------------|--|--|--|
| $p$       | $c$ | $p_{\text{FWE-corr}}$ | $q_{\text{FDR-corr}}$ | $k_E$ | $p_{\text{uncorr}}$ | $p_{\text{FWE-corr}}$ | $q_{\text{FDR-corr}}$ | $T$ | $(Z_{\equiv})$ | $p_{\text{uncorr}}$ |  |  |  |

*no suprathreshold clusters*

table shows 3 local maxima more than 8.0mm apart

|                                                    |                                                           |
|----------------------------------------------------|-----------------------------------------------------------|
| Height threshold: T = 3.33, p = 0.001 (0.998)      | Degrees of freedom = [1.0, 36.0]                          |
| Extent threshold: k = 10 voxels, p = 0.665 (0.984) | FWHM = 16.1 16.2 16.2 mm mm mm; 8.0 8.1 8.1 (voxels)      |
| Expected voxels per cluster, <k> = 50.877          | Volume: 2093424 = 261678 voxels = 465.5 resels            |
| Expected number of clusters, <c> = 4.11            | Voxel size: 2.0 2.0 2.0 mm mm mm; (resel = 527.26 voxels) |
| FWEp: 5.416, FDRp: Inf, FWEc: Inf, FDRc: Inf       |                                                           |

## Not Beautiful 200-300 ms

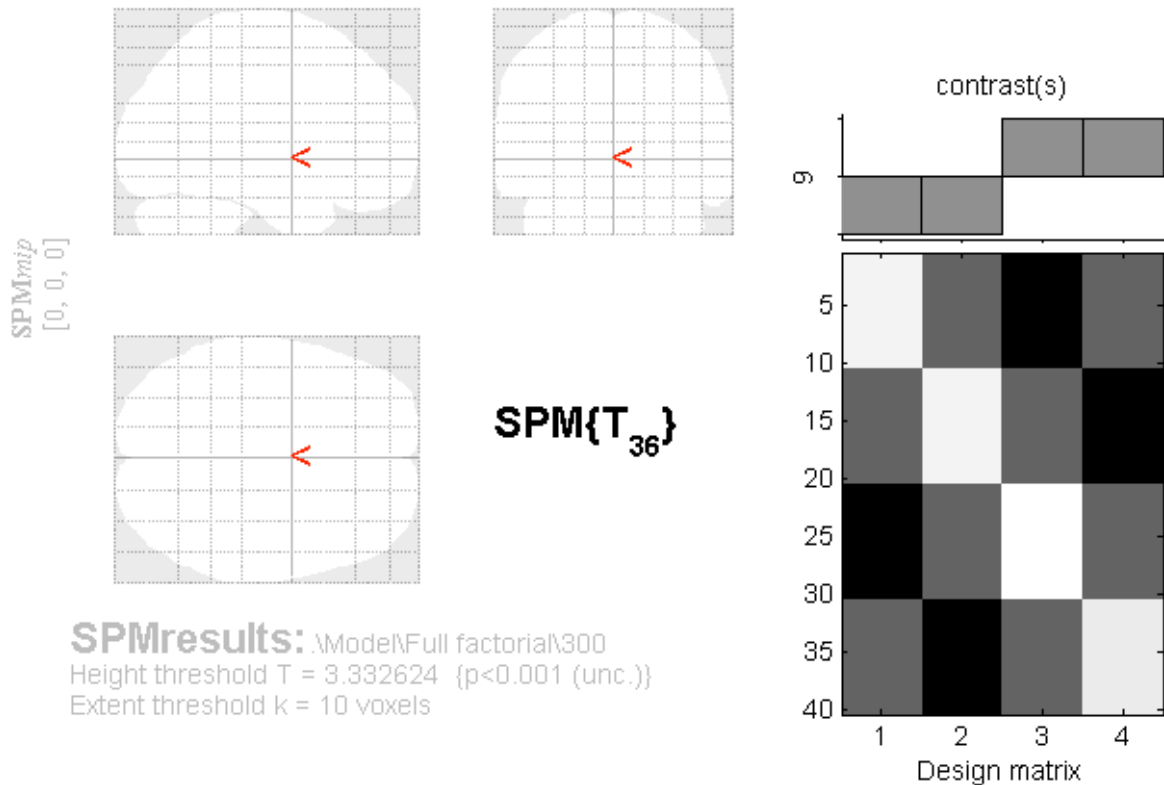

### Statistics: *p-values adjusted for search volume*

| set-level |     | cluster-level         |                       |       |                     | peak-level            |                       |     |                | mm mm mm            |  |  |  |
|-----------|-----|-----------------------|-----------------------|-------|---------------------|-----------------------|-----------------------|-----|----------------|---------------------|--|--|--|
| $p$       | $c$ | $p_{\text{FWE-corr}}$ | $q_{\text{FDR-corr}}$ | $k_E$ | $p_{\text{uncorr}}$ | $p_{\text{FWE-corr}}$ | $q_{\text{FDR-corr}}$ | $T$ | $(Z_{\equiv})$ | $p_{\text{uncorr}}$ |  |  |  |

*no suprathreshold clusters*

*table shows 3 local maxima more than 8.0mm apart*

|                                                            |                                                            |
|------------------------------------------------------------|------------------------------------------------------------|
| Height threshold: $T = 3.33$ , $p = 0.001$ (0.885)         | Degrees of freedom = [1.0, 36.0]                           |
| Extent threshold: $k = 10$ voxels, $p = 0.827$ (0.833)     | FWHM = 23.7 23.9 23.5 mm mm mm; 11.8 12.0 11.7 (voxels)    |
| Expected voxels per cluster, $\langle k \rangle = 160.302$ | Volume: 2078256 = 259782 voxels = 146.6 resels             |
| Expected number of clusters, $\langle c \rangle = 1.79$    | Voxel size: 2.0 2.0 2.0 mm mm mm; (resel = 1661.25 voxels) |
| FWEp: 4.986, FDRp: Inf, FWEc: Inf, FDRc: Inf               |                                                            |

## Not Beautiful 300-400 ms

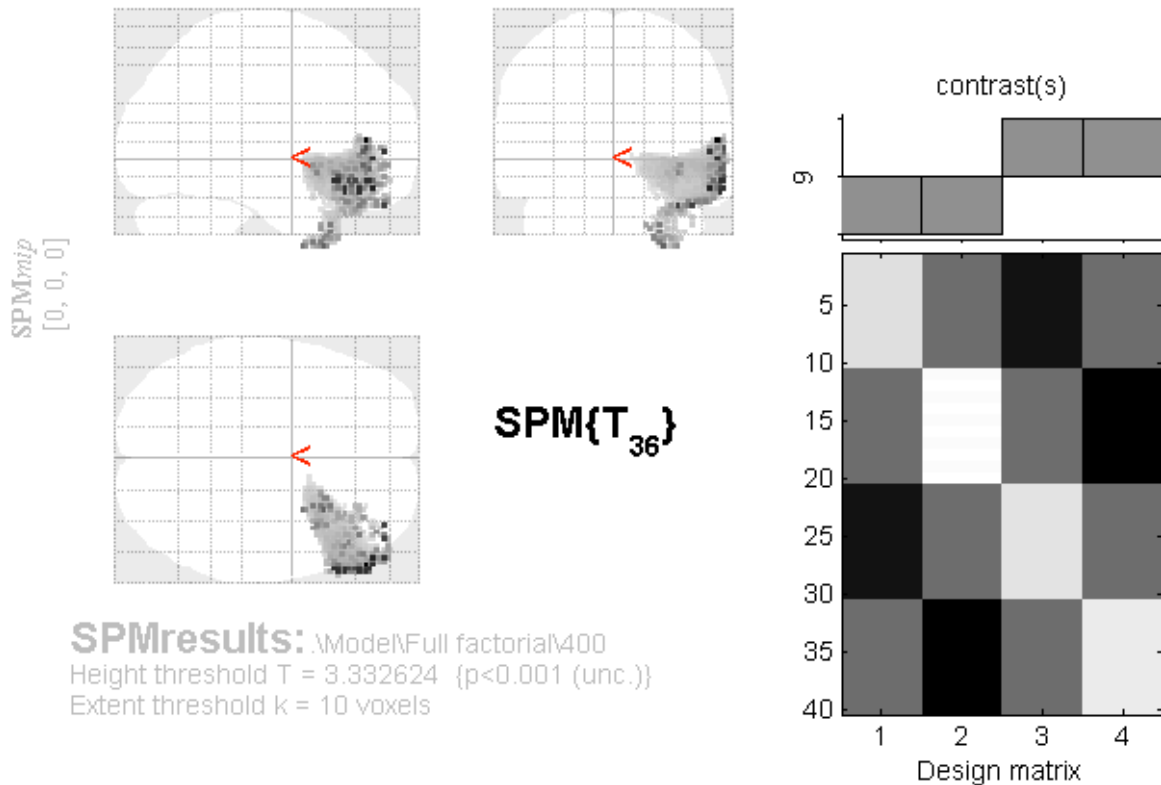

### Statistics: *p-values adjusted for search volume*

| set-level |     | cluster-level         |                       |       |                     | peak-level            |                       |      |                  |                     | mm mm mm |    |     |
|-----------|-----|-----------------------|-----------------------|-------|---------------------|-----------------------|-----------------------|------|------------------|---------------------|----------|----|-----|
| $p$       | $c$ | $p_{\text{FWE-corr}}$ | $q_{\text{FDR-corr}}$ | $k_E$ | $p_{\text{uncorr}}$ | $p_{\text{FWE-corr}}$ | $q_{\text{FDR-corr}}$ | $T$  | $(Z_{\text{E}})$ | $p_{\text{uncorr}}$ |          |    |     |
| 0.770     | 2   | 0.000                 | 0.000                 | 2913  | 0.000               | 0.119                 | 0.836                 | 4.85 | 4.23             | 0.000               | 58       | 42 | 10  |
|           |     |                       |                       |       |                     | 0.195                 | 0.836                 | 4.63 | 4.07             | 0.000               | 54       | 46 | -16 |
|           |     |                       |                       |       |                     | 0.218                 | 0.836                 | 4.57 | 4.03             | 0.000               | 58       | 46 | 0   |
|           |     | 0.893                 | 0.941                 | 24    | 0.601               | 0.282                 | 0.836                 | 4.45 | 3.95             | 0.000               | 36       | 52 | -26 |
|           |     | 0.736                 | 0.836                 | 3.84  | 3.49                | 0.000                 | 48                    | 54   | -24              |                     |          |    |     |

table shows 3 local maxima more than 8.0mm apart

Height threshold: T = 3.33, p = 0.001 (0.976)  
 Extent threshold: k = 10 voxels, p = 0.753 (0.939)  
 Expected voxels per cluster, <k> = 87.697  
 Expected number of clusters, <c> = 2.80  
 FWEp: 5.210, FDRp: Inf, FWEc: 2913, FDRc: 2913

Degrees of freedom = [1.0, 36.0]  
 FWHM = 19.1 19.8 19.3 mm mm mm; 9.6 9.9 9.6 (voxels)  
 Volume: 2076168 = 259521 voxels = 267.8 resels  
 Voxel size: 2.0 2.0 2.0 mm mm mm; (resel = 908.83 voxels)

## Not Beautiful 400-500 ms

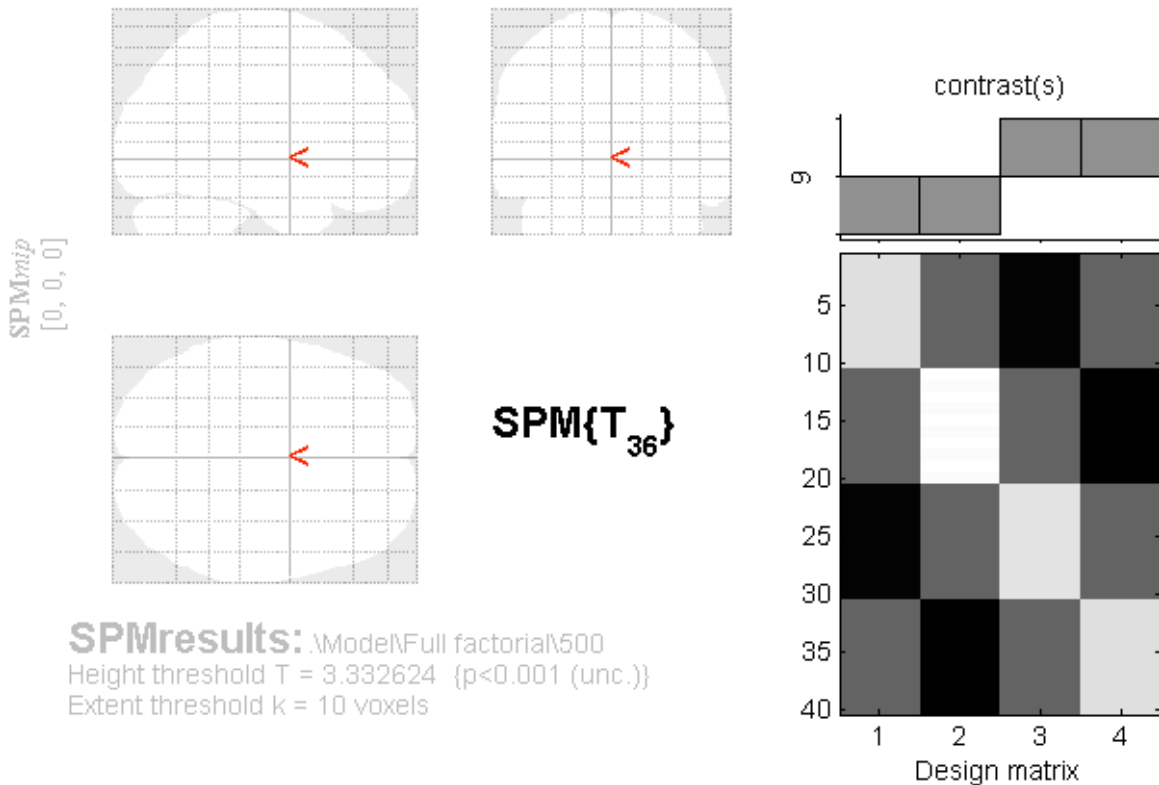

### Statistics: *p-values adjusted for search volume*

| set-level |     | cluster-level         |                       |       |                     | peak-level            |                       |     |                | mm mm mm            |  |  |  |
|-----------|-----|-----------------------|-----------------------|-------|---------------------|-----------------------|-----------------------|-----|----------------|---------------------|--|--|--|
| $p$       | $c$ | $p_{\text{FWE-corr}}$ | $q_{\text{FDR-corr}}$ | $k_E$ | $p_{\text{uncorr}}$ | $p_{\text{FWE-corr}}$ | $q_{\text{FDR-corr}}$ | $T$ | $(Z_{\equiv})$ | $p_{\text{uncorr}}$ |  |  |  |

*no suprathreshold clusters*

*table shows 3 local maxima more than 8.0mm apart*

|                                                    |                                                            |
|----------------------------------------------------|------------------------------------------------------------|
| Height threshold: T = 3.33, p = 0.001 (0.837)      | Degrees of freedom = [1.0, 36.0]                           |
| Extent threshold: k = 10 voxels, p = 0.846 (0.784) | FWHM = 25.4 25.8 24.5 mm mm mm; 12.7 12.9 12.3 (voxels)    |
| Expected voxels per cluster, <k> = 194.043         | Volume: 2056960 = 257120 voxels = 119.9 resels             |
| Expected number of clusters, <c> = 1.53            | Voxel size: 2.0 2.0 2.0 mm mm mm; (resel = 2010.93 voxels) |
| FWEp: 4.911, FDRp: Inf, FWEc: Inf, FDRc: Inf       |                                                            |

## Not Beautiful 500-600 ms

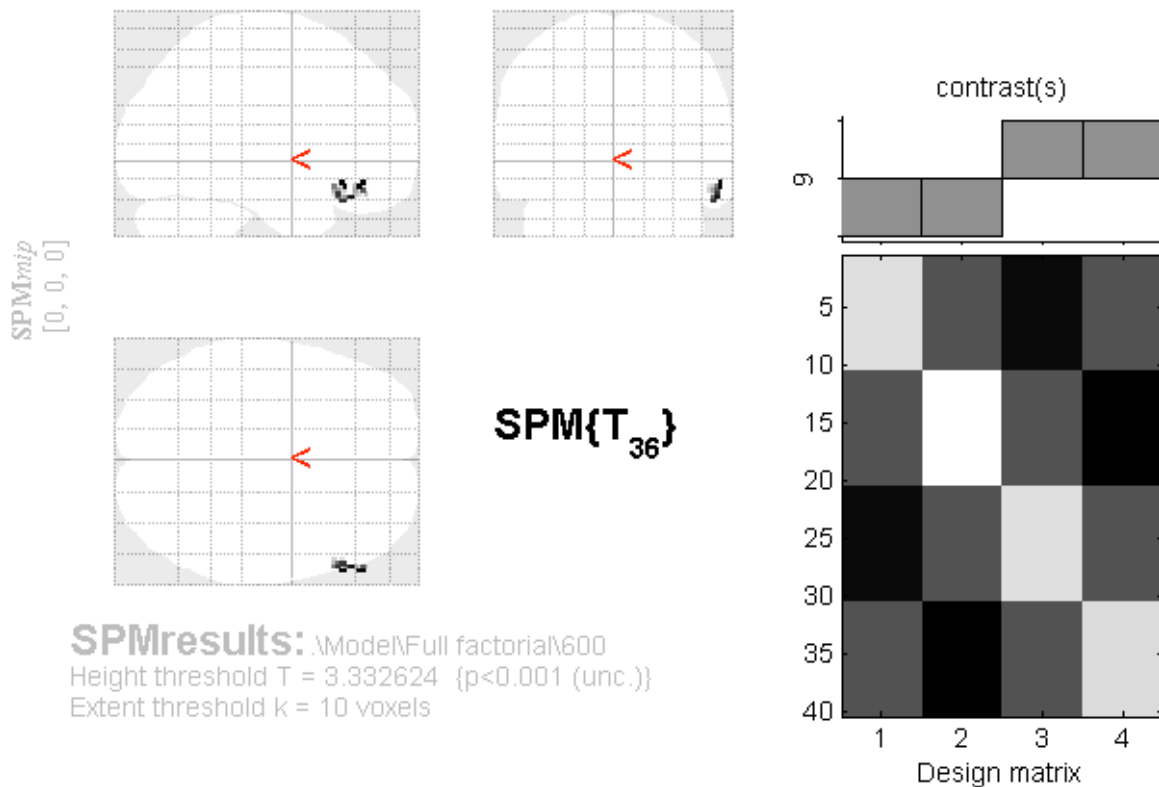

### Statistics: *p-values adjusted for search volume*

| cluster-level         |                       |       |                     | peak-level            |                       |      |                   |                     | mm mm mm |    |     |
|-----------------------|-----------------------|-------|---------------------|-----------------------|-----------------------|------|-------------------|---------------------|----------|----|-----|
| $p_{\text{FWE-corr}}$ | $q_{\text{FDR-corr}}$ | $k_E$ | $p_{\text{uncorr}}$ | $p_{\text{FWE-corr}}$ | $q_{\text{FDR-corr}}$ | $T$  | $(Z_{\text{eq}})$ | $p_{\text{uncorr}}$ |          |    |     |
| 0.583                 | 0.975                 | 30    | 0.785               | 0.372                 | 0.805                 | 3.76 | 3.43              | 0.000               | 60       | 30 | -14 |
|                       |                       |       |                     | 0.372                 | 0.805                 | 3.76 | 3.43              | 0.000               | 60       | 40 | -12 |
|                       |                       |       |                     | 0.428                 | 0.805                 | 3.67 | 3.36              | 0.000               | 56       | 30 | -22 |

table shows 3 local maxima more than 8.0mm apart

Height threshold: T = 3.33, p = 0.001 (0.672)  
 Extent threshold: k = 10 voxels, p = 0.890 (0.629)  
 Expected voxels per cluster, <k> = 335.884  
 Expected number of clusters, <c> = 0.99  
 FWEp: 4.707, FDRp: Inf, FWEc: Inf, FDRc: Inf

Degrees of freedom = [1.0, 36.0]  
 FWHM = 30.4 31.6 28.9 mm mm mm; 15.2 15.8 14.5 (voxels)  
 Volume: 2047464 = 255933 voxels = 68.9 resels  
 Voxel size: 2.0 2.0 2.0 mm mm mm; (resel = 3480.87 voxels)

## Not Beautiful 600-700 ms

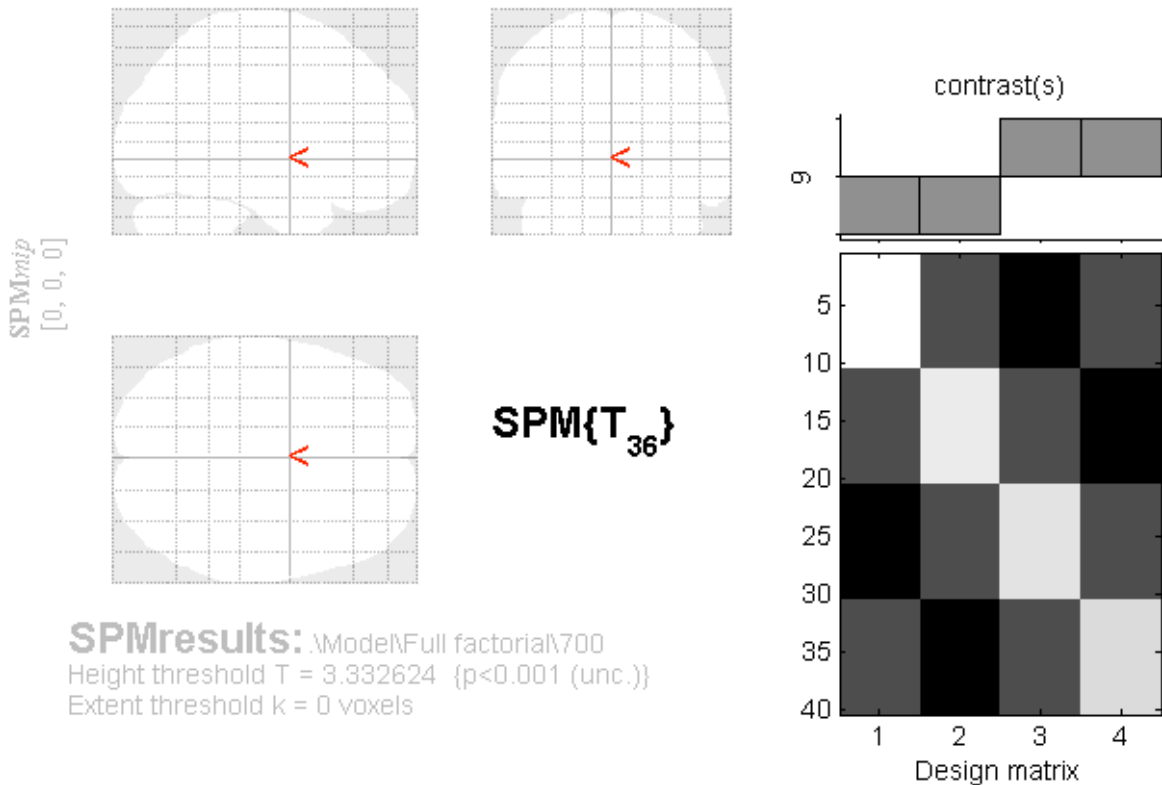

### Statistics: *p-values adjusted for search volume*

| set-level |     | cluster-level         |                       |       |                     | peak-level            |                       |     |                | mm mm mm            |  |  |  |
|-----------|-----|-----------------------|-----------------------|-------|---------------------|-----------------------|-----------------------|-----|----------------|---------------------|--|--|--|
| $p$       | $c$ | $p_{\text{FWE-corr}}$ | $q_{\text{FDR-corr}}$ | $k_E$ | $p_{\text{uncorr}}$ | $p_{\text{FWE-corr}}$ | $q_{\text{FDR-corr}}$ | $T$ | $(Z_{\equiv})$ | $p_{\text{uncorr}}$ |  |  |  |

*no suprathreshold clusters*

table shows 3 local maxima more than 8.0mm apart

|                                                   |                                                            |
|---------------------------------------------------|------------------------------------------------------------|
| Height threshold: T = 3.33, p = 0.001 (0.649)     | Degrees of freedom = [1.0, 36.0]                           |
| Extent threshold: k = 0 voxels, p = 1.000 (0.649) | FWHM = 31.2 32.1 30.0 mm mm mm; 15.6 16.0 15.0 (voxels)    |
| Expected voxels per cluster, <k> = 361.643        | Volume: 2052664 = 256583 voxels = 64.2 resels              |
| Expected number of clusters, <c> = 1.05           | Voxel size: 2.0 2.0 2.0 mm mm mm; (resel = 3747.82 voxels) |
| FWEp: 4.680, FDRp: Inf, FWEc: Inf, FDRc: Inf      |                                                            |

## Not Beautiful 700-800 ms

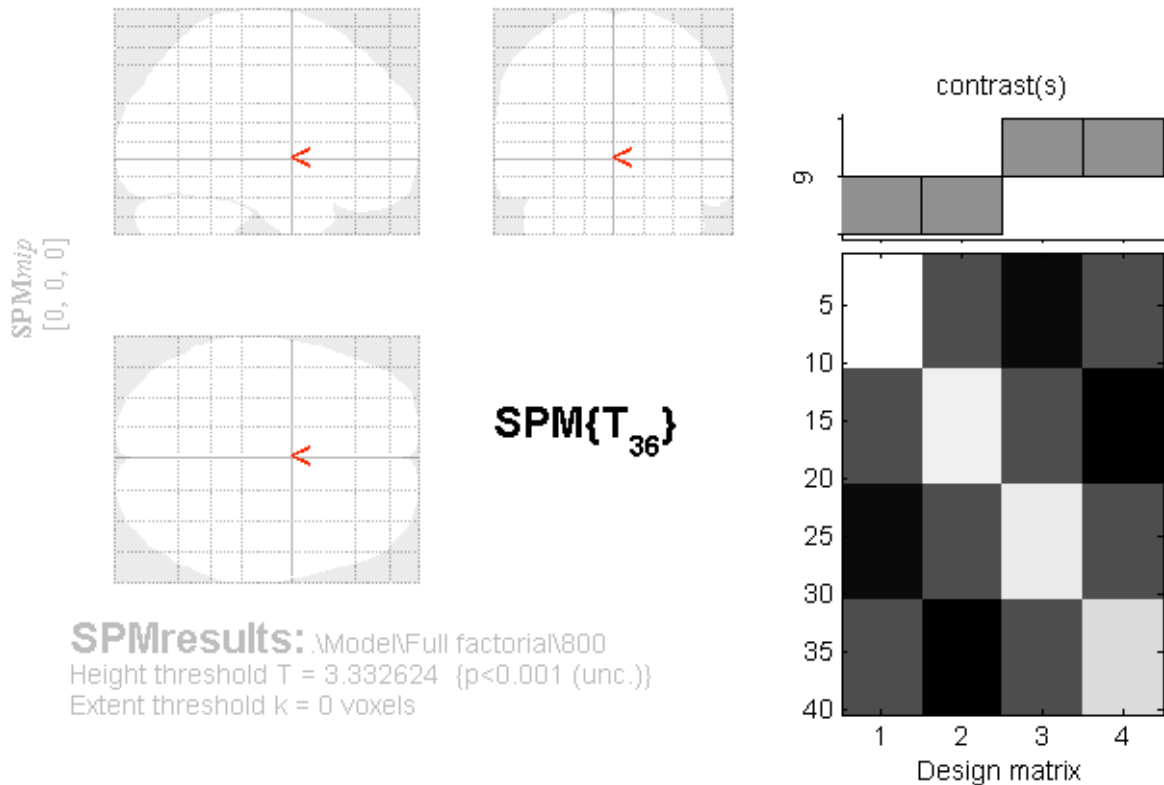

### Statistics: *p-values adjusted for search volume*

| set-level |     | cluster-level         |                       |       |                     | peak-level            |                       |     |                | mm mm mm            |  |  |  |
|-----------|-----|-----------------------|-----------------------|-------|---------------------|-----------------------|-----------------------|-----|----------------|---------------------|--|--|--|
| $p$       | $c$ | $p_{\text{FWE-corr}}$ | $q_{\text{FDR-corr}}$ | $k_E$ | $p_{\text{uncorr}}$ | $p_{\text{FWE-corr}}$ | $q_{\text{FDR-corr}}$ | $T$ | $(Z_{\equiv})$ | $p_{\text{uncorr}}$ |  |  |  |

*no suprathreshold clusters*

table shows 3 local maxima more than 8.0mm apart

|                                                   |                                                            |
|---------------------------------------------------|------------------------------------------------------------|
| Height threshold: T = 3.33, p = 0.001 (0.513)     | Degrees of freedom = [1.0, 36.0]                           |
| Extent threshold: k = 0 voxels, p = 1.000 (0.513) | FWHM = 35.6 37.5 34.6 mm mm mm; 17.8 18.7 17.3 (voxels)    |
| Expected voxels per cluster, <k> = 557.385        | Volume: 2040512 = 255064 voxels = 41.4 resels              |
| Expected number of clusters, <c> = 0.72           | Voxel size: 2.0 2.0 2.0 mm mm mm; (resel = 5776.34 voxels) |
| FWEp: 4.519, FDRp: Inf, FWEc: Inf, FDRc: Inf      |                                                            |



## Not Beautiful 800-900 ms

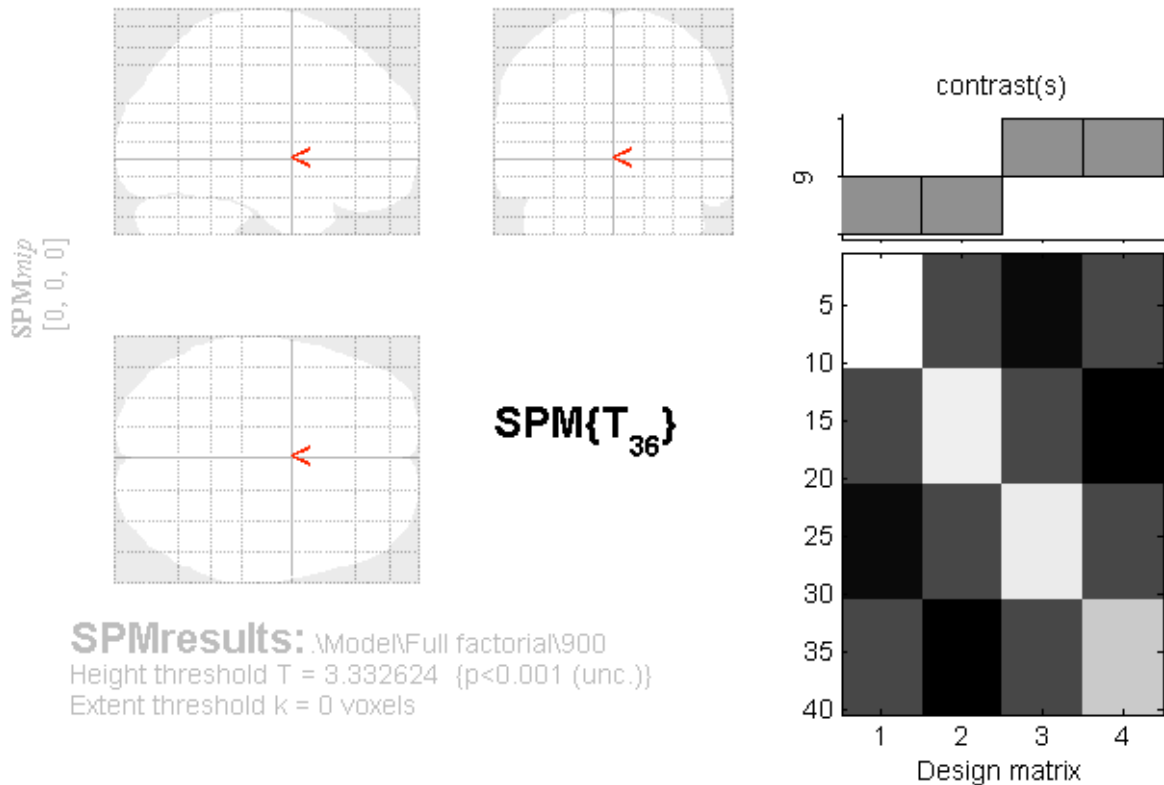

### Statistics: *p-values adjusted for search volume*

| set-level |     | cluster-level         |                       |       |                     | peak-level            |                       |     |                | mm mm mm            |  |  |  |
|-----------|-----|-----------------------|-----------------------|-------|---------------------|-----------------------|-----------------------|-----|----------------|---------------------|--|--|--|
| $p$       | $c$ | $p_{\text{FWE-corr}}$ | $q_{\text{FDR-corr}}$ | $k_E$ | $p_{\text{uncorr}}$ | $p_{\text{FWE-corr}}$ | $q_{\text{FDR-corr}}$ | $T$ | $(Z_{\equiv})$ | $p_{\text{uncorr}}$ |  |  |  |

*no suprathreshold clusters*

table shows 3 local maxima more than 8.0mm apart

|                                                            |                                                            |
|------------------------------------------------------------|------------------------------------------------------------|
| Height threshold: $T = 3.33$ , $p = 0.001$ (0.586)         | Degrees of freedom = [1.0, 36.0]                           |
| Extent threshold: $k = 0$ voxels, $p = 1.000$ (0.586)      | FWHM = 33.3 34.1 32.3 mm mm mm; 16.6 17.1 16.1 (voxels)    |
| Expected voxels per cluster, $\langle k \rangle = 441.453$ | Volume: 2053608 = 256701 voxels = 52.6 resels              |
| Expected number of clusters, $\langle c \rangle = 0.88$    | Voxel size: 2.0 2.0 2.0 mm mm mm; (resel = 4574.91 voxels) |
| FWEp: 4.607, FDRp: Inf, FWEc: Inf, FDRc: Inf               |                                                            |
